# Supplementary figures and images for: Machine Learning Algorithms for the Estimation of Water Quality Parameters in Lake Llanquihue in Southern Chile
Source: MDPI journal article supplement (doi:10.3390/w15111994), 2023-05-24

## Supplementing Information

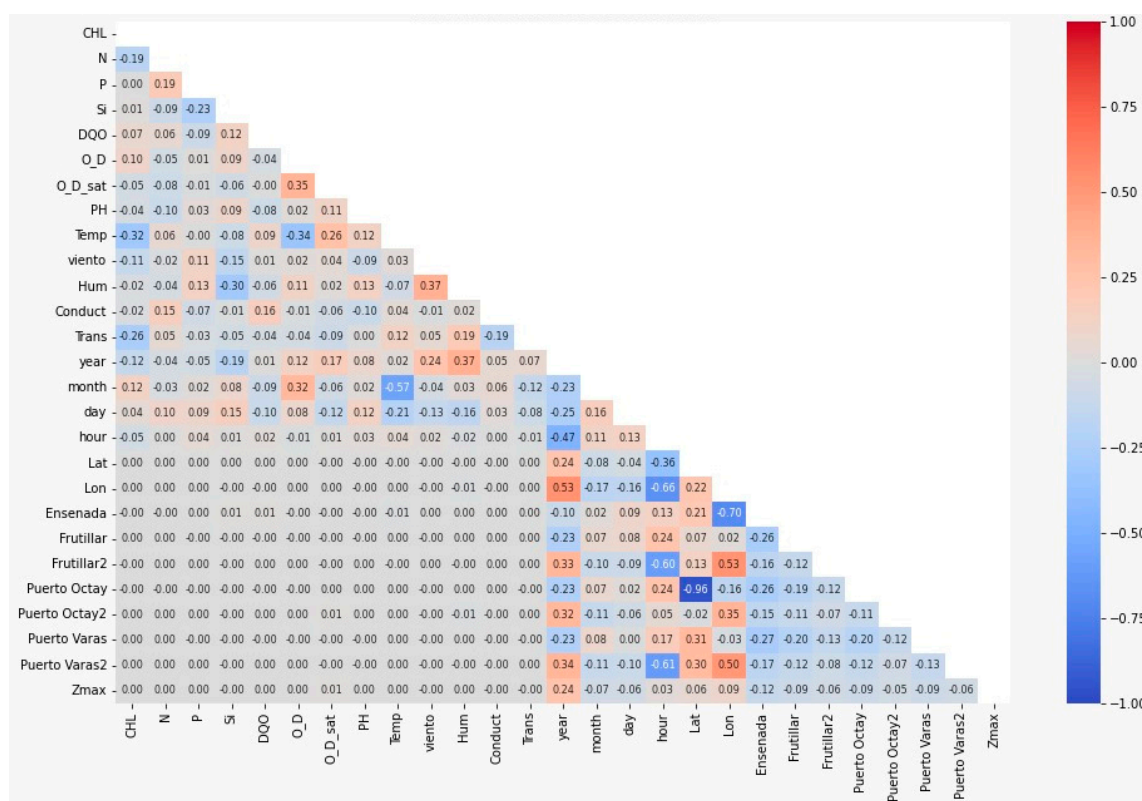

Figure S1. Correlation matrix between features

Supplement: s1 [file s1]
